1 **Life course longitudinal growth and risk of knee osteoarthritis at age 53 years: evidence**  
2 **from the 1946 British birth cohort study**

3 Katherine A. Staines<sup>1,2.</sup>, Rebecca Hardy<sup>3.</sup>, Hasmik J. Samvelyan<sup>1.</sup>, Kate A. Ward<sup>4.</sup>, Rachel  
4 Cooper<sup>5</sup>

5 1 School of Pharmacy and Biomolecular Sciences, University of Brighton, Brighton, UK

6 2 School of Applied Sciences, Edinburgh Napier University, Edinburgh UK

7 3 Cohort and Longitudinal Studies Enhancement Resources (CLOSER), UCL Institute of  
8 Education, London, UK

9 4 MRC Lifecourse Epidemiology, Human Development and Health, University of  
10 Southampton, Southampton, UK

11 5 Department of Sport and Exercise Sciences, Musculoskeletal Science and Sports Medicine  
12 Research Centre, Manchester Metropolitan University, Manchester, UK.

13

14 Corresponding author:

15 Katherine A. Staines

16 School of Pharmacy and Biomolecular Sciences, University of Brighton, Brighton, BN2 4GJ

17 k.staines@brighton.ac.uk

18 01273 642094

19

20

21 Word count: 2834

22

**NOTE: This preprint reports new research that has not been certified by peer review and should not be used to guide clinical practice.**

23 **Abstract**

24 *Objectives*

25 To examine the relationship between height gain across childhood and adolescence with knee  
26 osteoarthritis in the MRC National Survey of Health and Development (NSHD).

27 *Methods*

28 Data are from 3035 male and female participants of the NSHD. Height was measured at ages  
29 2, 4, 6, 7, 11 and 15 years, and self-reported at ages 20 and 26 years. Associations between (i)  
30 height at each age (ii) height gain during specific life periods (iii) Super-Imposition by  
31 Translation And Rotation (SITAR) growth curve variables of height size, tempo and velocity,  
32 and knee osteoarthritis at 53 years were tested.

33 *Results*

34 In sex-adjusted models, taller height at 4 and 6 years were modestly associated with decreased  
35 odds of knee osteoarthritis at age 53 (ORs per 1cm increase in height at age 6: 0.97 and age 4:  
36 0.98 (95% CI: 0.95-1.00)). These associations were attenuated after adjustment for potential  
37 confounders. Similarly, taller adult achieved height measured at 26 and 53 years of age were  
38 associated with decreased odds of knee osteoarthritis (OR per 1cm increase in height: 0.98  
39 (95% CI 0.96 to 1.00)). No associations were found between height gain during specific life  
40 periods or the SITAR growth curve variables and odds of knee osteoarthritis.

41 *Conclusions*

42 There was some limited evidence to suggest that taller height in childhood is associated with  
43 decreased odds of knee osteoarthritis at age 53 years in this cohort. This work enhances our  
44 understanding of osteoarthritis predisposition and the contribution of life course height to this.

45 **Key words:** osteoarthritis, SITAR, growth, life course, birth cohort

## 46 **Introduction**

47 Joint health is reliant upon the preservation of the articular cartilage and, its degradation is one  
48 of the main hallmarks of the degenerative joint disease osteoarthritis. Osteoarthritis,  
49 characterised by articular cartilage loss, subchondral bone thickening and osteophyte  
50 formation, is a major health care burden throughout the world. It is estimated that worldwide  
51 at least 10% of men and 18% of women aged over 60 years have symptomatic osteoarthritis.  
52 Osteoarthritis causes much pain and disability, and yet its underlying molecular mechanisms  
53 are not fully understood. Indeed, even the precipitating pathology remains a matter of debate  
54 and we are still unable to identify those at most risk of developing the disease.

55 Our previous work in a spontaneous murine model of ageing-related osteoarthritis, the STR/Ort  
56 mouse, revealed accelerated long bone growth, increased growth plate chondrocyte  
57 differentiation, and widespread abnormal expression of chondrocyte markers in osteoarthritis-  
58 prone mice.[1] Furthermore, we revealed enriched growth plate bridging, indicative of  
59 advanced and thus premature growth plate closure, in these mice.[1] Together this suggested  
60 that osteoarthritis development is associated with an accelerated growth phenotype and  
61 advanced pubertal onset.

62 Consistent with this finding, canine hip dysplasia (a hereditary predisposition to degenerative  
63 osteoarthritis) is more common in certain breeds, in particular larger breeds which tend to grow  
64 more rapidly.[2] However, associations between lifetime linear growth, i.e. height gain during  
65 specific life periods up to the attainment of adult height, and knee osteoarthritis development  
66 in human populations have, to our knowledge, not yet been studied. Previous epidemiological  
67 analyses of the Hertfordshire Cohort Study and the Medical Research Council National Survey  
68 of Health and Development (MRC NSHD) have found associations between low birth weight  
69 and high body mass index across life and increased risk of developing osteoarthritis.[3,4] This  
70 therefore suggests that life course size may predispose to osteoarthritis later in life.

71 Herein, we use one of these studies, the MRC NSHD, to examine the relationship between  
72 childhood and adolescent height growth and knee osteoarthritis at 53 years. Our aims were to:  
73 (1) test associations between height at different ages in early life and knee osteoarthritis in  
74 adulthood; (2) assess how patterns of height growth during childhood and adolescence are  
75 associated with knee osteoarthritis.

## 76 **Methods**

### 77 *Study sample*

78 The MRC NSHD is a birth cohort study, which includes a nationally representative sample of  
79 2815 men and 2547 women born in England, Scotland, and Wales during 1 week in March  
80 1946. The cohort has been followed prospectively across life with outcome data for these  
81 analyses drawn from a data collection in 1999, when participants were 53 years old.[5] At 53,  
82 3035 participants (1472 men, 1563 women) participated, the majority (n=2989) were  
83 interviewed and examined in their own homes by research nurses with others completing a  
84 postal questionnaire (n=46). The responding sample at age 53 is in most respects representative  
85 of the national population of a similar age.[6] The data collection at age 53 years received  
86 ethical approval from the North Thames Multi-centre Research Ethics Committee, and written  
87 informed consent was given by all respondents.

### 88 *Outcome – knee osteoarthritis*

89 During the home visit at age 53 years, trained nurses conducted clinical examinations of study  
90 participants' knees.[3] Based on these examinations, the American College of Rheumatology  
91 criteria for the clinical diagnosis of idiopathic knee osteoarthritis were used to identify those  
92 with knee pain in either knee on most days for at least 1 month in the last year prior to the  
93 examination in 1999, and at least two of the following: stiffness, crepitus, bony tenderness and  
94 bony enlargement.[7]

95 *Height variables*

96 Height was measured by nurses using standardised protocols at ages 2, 4, 7, 11 and 15 years,  
97 and self-reported at ages 20 and 26. Individual patterns of height growth during puberty were  
98 estimated using the SuperImposition by Translation and Rotation (SITAR) model of growth  
99 curve analysis, as previously described by Cole et al.[9,10] The SITAR model estimates the  
100 mean growth curve and three individual-specific parameters: size (reflecting differences in  
101 mean height), tempo (reflecting differences in the timing of the pubertal growth spurt) and  
102 velocity (reflecting differences in the duration of the growth spurt), each expressed relative to  
103 the mean curve.

104 *Covariates*

105 Factors that may potentially confound the main associations of interest were selected *a priori*  
106 based on previous findings in the literature.[3] These were occupational class, sporting ability  
107 in adolescence, and leisure time physical activity at 53 years. As an indicator of socioeconomic  
108 position (SEP), occupational class at age 53 years (or if not available, the most recent measure  
109 in adulthood) was categorised into two groups – non manual (professional, managerial/  
110 technical, skilled non-manual) and manual (skilled manual, partly skilled, unskilled) using the  
111 Registrar General's Social Classification.[11] At age 13 years, children were graded as above  
112 average, average, or below average according to teacher reports of their sporting ability. This  
113 measure is used as a marker of motor skills and coordination evidenced by school-based  
114 physical activity and is predictive of leisure-time physical activity levels in adulthood.[12]  
115 Participation in leisure-time physical activity at age 53 was ascertained by asking participants  
116 to report whether they had undertaken any sports, vigorous leisure activities, or exercises in  
117 their spare time, not including getting to and from work, in the last 4 weeks prior to the  
118 examination and if so on how many occasions they had done these activities. This was

119 categorised into three groups: inactive (no participation); moderately active (participated 1 to  
120 4 times); most active (participated  $\geq 5$  times).

### 121 *Statistical analysis*

122 To address the two main aims, we used logistic regression models to test associations between:  
123 (1) height at each age (aim 1); (2) conditional changes in height during specific life periods  
124 (early childhood: 2–4 years; late childhood: 4–7 years; childhood to adolescence: 7–15 years;  
125 adolescence to young adulthood: 15–20 years) (aim 2) and; (3) each SITAR height variable  
126 (aim 2) and odds ratios (ORs) of knee osteoarthritis. In initial models, we formally tested for  
127 interactions between sex and each main independent variable and where no evidence of  
128 interaction was found, models were fitted with men and women combined and adjustment for  
129 sex. In each set of models we first adjusted for sex (where there was no evidence of interaction)  
130 before then also adjusting for early and adult life factors (sporting ability + physical activity +  
131 occupational class). In models to address aim 2, we generated conditional changes in height by  
132 regressing each height measure on the earlier height measure for each sex and calculating the  
133 residuals.[13] The residuals were standardized (to have mean 0 and SD of 1) to ensure their  
134 comparability and these were included as the main independent variables. To maximise  
135 statistical power each set of models were run on the sample with valid data for the outcome,  
136 the specified independent variable and covariates. Data were analysed using Stata statistical  
137 software (version SE 14.2).

### 138 *Sensitivity analyses*

139 In additional models we adjusted for adult weight at 53 years, considered a potential mediator.  
140 We also adjusted for weight at each age for aim 1, conditional weight gain (aim 2) and the  
141 SITAR weight variables (aim 2) to assess the contribution of weight during growth. To assess  
142 the potential impact of having to exclude those participants lost to follow-up and with missing  
143 data, comparisons were drawn between those included and those excluded in the main analyses.

144 In addition, the sex-adjusted analyses were rerun in the maximum available samples including  
145 all available participants rather than being restricted to the sample with valid data on all  
146 measures. To assess the influence of potential secondary osteoarthritis on our findings the main  
147 analyses were repeated after excluding those participants with knee osteoarthritis who had  
148 reported ever seeing a doctor about an injury to the knee in which osteoarthritis was diagnosed.

## 149 **Results**

### 150 Cohort characteristics

151 A total of 1437 men and 1478 women had complete data on the SITAR parameters of height  
152 and knee osteoarthritis. Descriptive statistics are described in Table 1. In this sample, the  
153 percentage of individuals with knee osteoarthritis at 53 years of age was higher in women  
154 (13.04%) than in men (7.36%).

|                         |                   | <b>Men (Max n=1437)</b> |             |           | <b>Women (Max n=1478)</b> |             |           |
|-------------------------|-------------------|-------------------------|-------------|-----------|---------------------------|-------------|-----------|
|                         |                   | <b>n</b>                | <b>Mean</b> | <b>SD</b> | <b>n</b>                  | <b>Mean</b> | <b>SD</b> |
| Height 2 years (cm)     |                   | 1211                    | 85.91       | 5.24      | 1197                      | 84.72       | 4.57      |
| Height 4 years (cm)     |                   | 1288                    | 103.51      | 5.10      | 1307                      | 102.84      | 5.05      |
| Height 6 years (cm)     |                   | 1238                    | 114.46      | 5.25      | 1255                      | 113.74      | 5.26      |
| Height 7 years (cm)     |                   | 1249                    | 120.35      | 5.65      | 1303                      | 119.65      | 5.50      |
| Height 11 years (cm)    |                   | 1230                    | 140.62      | 6.73      | 1257                      | 141.16      | 6.94      |
| Height 15 years (cm)    |                   | 1135                    | 162.04      | 8.86      | 1156                      | 158.65      | 6.22      |
| Height 20 years (cm)    |                   | 1155                    | 176.76      | 6.72      | 1231                      | 162.62      | 6.24      |
| Height at 53 years (cm) |                   | 1423                    | 174.59      | 6.56      | 1467                      | 161.58      | 5.97      |
|                         |                   | <b>n</b>                | <b>%</b>    |           | <b>n</b>                  | <b>%</b>    |           |
| Knee osteoarthritis     |                   | 105                     | 7.31        |           | 193                       | 13.06       |           |
| Sporting ability:       | Above average     | 235                     | 18.98       |           | 220                       | 17.31       |           |
|                         | Average           | 793                     | 64.05       |           | 902                       | 70.97       |           |
|                         | Below average     | 210                     | 16.96       |           | 149                       | 11.72       |           |
| Physical activity:      | Inactive          | 693                     | 48.26       |           | 748                       | 50.61       |           |
|                         | Moderately active | 268                     | 18.66       |           | 240                       | 16.24       |           |
|                         | Most active       | 475                     | 33.08       |           | 490                       | 33.15       |           |
| Social class:           | Non-manual        | 868                     | 60.91       |           | 1044                      | 71.21       |           |
|                         | Manual            | 557                     | 39.09       |           | 422                       | 28.79       |           |

155 **Table 1:** Characteristics of the sample from the MRC National Survey of Health and Development with  
156 complete data on the SITAR parameters of height and the outcome, knee osteoarthritis. Knee  
157 osteoarthritis, social class and physical activity reported at 53 years, sporting ability at 13 years.

### 158 Life course height and knee osteoarthritis

159 In sex-adjusted models, taller height at age 6 (OR of knee osteoarthritis 0.97 per 1cm increase  
 160 in height, 95% CI 0.95 to 1.00) was modestly associated with lower odds of knee osteoarthritis  
 161 at age 53 years (Model 1; Table 2). There was also weak evidence of an association at age 4  
 162 (OR of knee osteoarthritis 0.98 per 1cm increase in height, 95% CI 0.95 to 1.00) (Table 2).  
 163 However, with adjustment for early and adult life factors (Model 2), there was no longer clear  
 164 evidence of associations at either of these ages (Table 2). Similarly, in sex-adjusted models  
 165 taller adult achieved height measured at 53 years of age (or self-reported at 26 years) was  
 166 associated with decreased odds of knee osteoarthritis (OR of knee osteoarthritis 0.98 per 1cm  
 167 increase in height, 95% CI 0.96 to 1.00) (Table 2), however this too was attenuated when  
 168 adjusted for early and adult life factors (Model 2). There was no evidence of association  
 169 between height at any other age and knee osteoarthritis.

| Height (per cm) | n    | Model | Odds ratio | 95% CI |      | p    |
|-----------------|------|-------|------------|--------|------|------|
| 2 years         | 2085 | 1     | 0.99       | 0.96   | 1.02 | 0.5  |
|                 |      | 2     | 1.00       | 0.97   | 1.03 | 0.8  |
| 4 years         | 2281 | 1     | 0.98       | 0.95   | 1.00 | 0.07 |
|                 |      | 2     | 0.99       | 0.96   | 1.02 | 0.4  |
| 6 years         | 2232 | 1     | 0.97       | 0.95   | 1.00 | 0.05 |
|                 |      | 2     | 0.99       | 0.96   | 1.01 | 0.3  |
| 7 years         | 2321 | 1     | 0.98       | 0.96   | 1.01 | 0.1  |
|                 |      | 2     | 0.99       | 0.97   | 1.02 | 0.6  |
| 11 years        | 2314 | 1     | 0.99       | 0.97   | 1.01 | 0.5  |
|                 |      | 2     | 1.00       | 0.98   | 1.02 | 0.9  |
| 15 years        | 2150 | 1     | 0.99       | 0.97   | 1.01 | 0.5  |
|                 |      | 2     | 1.00       | 0.98   | 1.02 | 1    |
| 20 years        | 2144 | 1     | 0.99       | 0.96   | 1.01 | 0.2  |
|                 |      | 2     | 0.99       | 0.97   | 1.02 | 0.6  |
| 26 years        | 2231 | 1     | 0.98       | 0.96   | 1.00 | 0.08 |
|                 |      | 2     | 0.99       | 0.97   | 1.01 | 0.3  |
| 53 years        | 2474 | 1     | 0.98       | 0.96   | 1.00 | 0.03 |
|                 |      | 2     | 0.99       | 0.97   | 1.01 | 0.3  |

170 **Table 2:** Associations between height (per cm) at different ages throughout childhood, adolescence and  
 171 young adulthood and odds ratios of knee osteoarthritis at age 53 years. Logistic regression Model 1:  
 172 adjusted for sex; Model 2: further adjusted for sporting ability, physical activity and social class. There  
 173 was little evidence of sex interaction in any of these models:  $P > 0.09$ .

174 Height growth and knee osteoarthritis



175 No associations were found between height gains during any of the four periods assessed and  
 176 odds of knee osteoarthritis at 53 years (Table 3). There was also no evidence of associations  
 177 between height size, tempo or velocity (SITAR variables) and knee osteoarthritis at 53 years  
 178 (Model 1; Table 4).

| Conditional change | n    | Model | Odds ratio | 95% CI |      | p   |
|--------------------|------|-------|------------|--------|------|-----|
| 2 - 4 years        | 2004 | 1     | 0.91       | 0.78   | 1.05 | 0.2 |
|                    |      | 2     | 0.96       | 0.83   | 1.12 | 0.6 |
| 4 - 7 years        | 1885 | 1     | 0.93       | 0.80   | 1.08 | 0.3 |
|                    |      | 2     | 0.96       | 0.83   | 1.11 | 0.6 |
| 7 - 15 years       | 1862 | 1     | 1.10       | 0.94   | 1.27 | 0.2 |
|                    |      | 2     | 1.10       | 0.95   | 1.28 | 0.2 |
| 15 - 20 years      | 1752 | 1     | 1.03       | 0.88   | 1.20 | 0.7 |
|                    |      | 2     | 1.04       | 0.89   | 1.22 | 0.6 |

179 **Table 3:** Associations of conditional height gain (per standard deviation) during different periods of  
 180 growth (early childhood: 2–4 years; late childhood: 4-7 years; childhood to adolescence: 7–15 years;  
 181 adolescence to young adulthood: 15–20 years) with knee osteoarthritis at 53 years. Logistic regression  
 182 Model 1: adjusted for sex; Model 2: further adjusted for sporting ability, physical activity and social  
 183 class. There was little evidence of sex interaction in any of these models:  $P > 0.06$ .

| SITAR variable<br>(n=2493) | Model | Odds ratio | 95% CI |      | p   |
|----------------------------|-------|------------|--------|------|-----|
| Size (cm)                  | 1     | 0.98       | 0.96   | 1.01 | 0.2 |
|                            | 2     | 0.99       | 0.97   | 1.02 | 0.6 |
| Tempo (%)                  | 1     | 1.00       | 0.98   | 1.01 | 0.6 |
|                            | 2     | 0.99       | 0.98   | 1.01 | 0.5 |
| Velocity (%)               | 1     | 1.00       | 0.99   | 1.01 | 0.9 |
|                            | 2     | 1.00       | 0.99   | 1.01 | 0.5 |

184 **Table 4:** Associations between each parameter of the SITAR model of growth curve analysis (height  
 185 size, tempo and velocity) and odds of knee osteoarthritis. Logistic regression Model 1: adjusted for sex  
 186 Model 2: further adjusted for sporting ability, physical activity and social class. There was little  
 187 evidence of sex interaction in any of these models:  $P > 0.5$

#### 188 Sensitivity analyses

189 Comparison of the characteristics of those individuals with complete data, vs those excluded  
 190 are described in Tables S1.1 & S1.2. We found that higher proportions of those included were  
 191 female (50.7% vs 43.7%;  $p < 0.001$ ; Tables S1.1 & S1.2). No significant differences were  
 192 observed in height between ages 2 – 15 years but at age 20, those included reported shorter  
 193 heights than those excluded (171.0 cm vs 169.4 cm; Tables S1.1 & S1.2).

194 When models were adjusted for adult weight and weight during growth, there were no  
195 substantive differences in findings when examining associations between height at different  
196 ages throughout childhood, adolescence and young adulthood, and odds ratios of knee  
197 osteoarthritis at age 53 years (Tables S2.1 & S3.1). Similarly, there were no substantive  
198 differences in findings when investigating associations between conditional height gain during  
199 different periods of growth, and odds ratios of knee osteoarthritis at age 53 years (Tables S2.2  
200 & S3.2). However, both these adjustments increased the association between SITAR height  
201 size and knee osteoarthritis (Tables S2.3 & 3.3). Moreover, adjusting for weight tempo also  
202 increased the association between height tempo and knee osteoarthritis at 53 years of age  
203 (Table S3.3).

204 When models were rerun on the maximum available samples including all available  
205 participants (Tables S4.1 – S4.3), there were no substantive differences in findings.

206 When we excluded those participants with potential secondary knee osteoarthritis from our  
207 analyses, there were no substantive differences in associations between height (Table S5.1) or  
208 conditional height gain (Table S5.2) and primary knee osteoarthritis at 53 years. A weak  
209 association was observed between SITAR height size when adjusted for sex (OR of knee  
210 osteoarthritis 0.97 per 1cm increase in height, 95% CI 0.95 to 1.00) (Model 1; Table S5.3).  
211 This was however attenuated when adjusted for early and adult life factors (Model 2; Table  
212 S5.3).

## 213 **Discussion**

214 In this nationally representative British birth cohort study, associations between greater height  
215 at ages 4 and 6 years and marginally lower odds knee osteoarthritis at age 53 were observed in  
216 sex-adjusted models, but these were attenuated after adjustment for early and adult life factors.  
217 No associations were observed between height changes during early childhood, late childhood,

218 childhood to adolescence or adolescence to young adulthood or SITAR parameters and knee  
219 osteoarthritis.

220 A major strength of our study is the availability of multiple prospectively ascertained  
221 measurements of height throughout childhood and adolescence in the NSHD, together with the  
222 already derived SITAR variables and measures of knee osteoarthritis in a relatively large  
223 sample of people in midlife.[9] This provided a unique opportunity to investigate the  
224 associations between life course longitudinal growth and knee osteoarthritis. We used two  
225 approaches to model growth and understand its relation to knee osteoarthritis in later life.  
226 Firstly, we used a conditional change approach to enable us to determine whether there are  
227 specific sensitive period/s of growth which may be associated with knee osteoarthritis. This  
228 can be interpreted as the change in height size above or below that expected given earlier  
229 height, and thus is useful in identifying accelerated or restricted growth.[14] We next chose the  
230 SITAR growth curve model since it was previously shown to effectively summarise pubertal  
231 growth based on three parameters of size, velocity and tempo.[9,10]

232 Our previous work explored associations between growth dynamics and osteoarthritis onset in  
233 a spontaneous murine model of osteoarthritis, the STR/Ort mouse.[1] We revealed accelerated  
234 long bone growth, aberrant expression of growth plate markers and enriched growth plate  
235 bridging, indicative of advanced and thus premature growth cessation, in these osteoarthritis-  
236 prone mice.[1] Together this suggested that these accelerated growth dynamics in young  
237 osteoarthritis-prone mice may underpin their osteoarthritis onset. However, whether these  
238 observations are unique to osteoarthritis in the STR/Ort mouse or are characteristic of human  
239 osteoarthritis in general had yet to be established. This study suggests that in the NSHD,  
240 associations between greater gains in height, indicative of accelerated growth, are not  
241 associated with increased odds of knee osteoarthritis. Rather, the modest associations found  
242 suggest the opposite. It is however important to note that this was examined in midlife when

243 the cohort are still relatively young, and osteoarthritis prevalence (7.31% in men; 13.06% in  
244 women) is lower than that seen currently in primary care at this age. It would therefore be of  
245 interest to further examine these potential associations in older individuals.

246 Primary osteoarthritis is described as naturally occurring or ageing-related osteoarthritis, while  
247 secondary osteoarthritis is associated with other causes including trauma. Our previous  
248 findings in the STR/Ort mouse examined primary murine osteoarthritis [1] and therefore to  
249 examine the influence of secondary knee osteoarthritis on the patterns of height growth in the  
250 NSHD, we ran a sensitivity analysis in which we excluded individuals who had reported  
251 consulting a Doctor about a knee injury. However, whilst we found no substantive differences  
252 in findings, this highlights the need to examine the risk of osteoarthritis in aged individuals  
253 where primary knee osteoarthritis is more prevalent.

254 Our study extends a previous study examining this British birth cohort in which prolonged  
255 exposure to high BMI through adulthood increased risk of development of knee osteoarthritis  
256 at age 53.[3] This is consistent with our sensitivity analyses in which adjustment for weight  
257 strengthened the associations between SITAR height size and odds of knee osteoarthritis. Wills  
258 et al., also found that BMI increases from childhood to adolescence (7–15 years) were  
259 positively associated with knee osteoarthritis, however this was in women only.[3] In our  
260 analyses, we found no evidence of differences in association by sex. We did find that in our  
261 cohort with complete data, women had a higher prevalence of knee osteoarthritis, similar to  
262 that reported previously in the NSHD, and in primary care.[3,15] Wills et al., concluded that  
263 the excessive weight during this period may result in altered mechanical loading to the knee  
264 joint. Similarly, it is likely that periods of accelerated growth will also impact on the  
265 biomechanics of the joint. The shape of the hip joint is largely determined in childhood, and  
266 previous studies have identified that in the NSHD, this is associated with (i) age of onset of  
267 walking in infancy [16] (ii) higher BMI at all ages and greater gains in BMI [17] and (iii)

268 height, weight, BMI and BMD at ages 60-64 years.[18] Similarly, in the Avon Longitudinal  
269 Study of Parents and Children (ALSPAC) cohort, hip shape in perimenopausal women is  
270 associated with hip osteoarthritis susceptibility loci and may contribute to hip osteoarthritis  
271 later in life.[19] Recent evidence in the ALSPAC cohort has also identified pubertal timing, as  
272 reflected by height tempo, to be associated with hip shape.[20] Further, in the UK Biobank,  
273 early menarche is associated with higher risk for osteoarthritis.[21] However these associations  
274 were not observed in this study.

275 Together, in this relatively large population-based cohort study, there was limited evidence to  
276 suggest that height in childhood is associated with odds of knee osteoarthritis at age 53 years.  
277 However, there were no associations with height gain during specific periods of growth, or  
278 with the SITAR height growth variables. This work enhances our understanding of  
279 osteoarthritis predisposition and the contribution of life course height to this.

## 280 **Acknowledgements & affiliations**

281 The authors thank all the participants of the MRC National Survey of Health and Development  
282 and all staff involved in data collection and data entry. The authors would like to acknowledge  
283 the Medical Research Council for funding to KS (MR/R022240/1). The authors would also like  
284 to thank Dr Alex Ireland (Manchester Metropolitan University, UK) for his insightful  
285 discussions during the preparation of this manuscript.

286 Data used in this publication are available to bona fide researchers upon request to the NSHD  
287 Data Sharing Committee via a standard application procedure. Further details can be found at  
288 <http://www.nshd.mrc.ac.uk/data>. doi: 10.5522/NSHD/Q101

## 289 **References**

290 1 Staines KA, Madi K, Mirczuk SM, *et al.* Endochondral Growth Defect and  
291 Deployment of Transient Chondrocyte Behaviors Underlie Osteoarthritis Onset in a

- 292 Natural Murine Model. *Arthritis Rheumatol* 2016;**68**:880–91. doi:10.1002/art.39508
- 293 2 Comhaire FH, Snaps F. Comparison of two canine registry databases on the prevalence  
294 of hip dysplasia by breed and the relationship of dysplasia with body weight and  
295 height. *Am J Vet Res* 2008;**69**:330–3. doi:10.2460/ajvr.69.3.330
- 296 3 Wills AK, Black S, Cooper R, *et al.* Life course body mass index and risk of knee  
297 osteoarthritis at the age of 53 years: Evidence from the 1946 British birth cohort study.  
298 *Ann Rheum Dis* 2012;**71**:655–60. doi:10.1136/ard.2011.154021
- 299 4 Clynes MA, Parsons C, Edwards MH, *et al.* Further evidence of the developmental  
300 origins of osteoarthritis: Results from the Hertfordshire Cohort Study. *J Dev Orig*  
301 *Health Dis* 2014;**5**:453–8. doi:10.1017/S2040174414000373
- 302 5 Kuh D, Pierce M, Adams J, *et al.* Cohort Profile: Updating the cohort profile for the  
303 MRC National Survey of Health and Development: a new clinic-based data collection  
304 for ageing research. *Int J Epidemiol* 2011;**40**:e1–9. doi:10.1093/ije/dyq231
- 305 6 Wadsworth M, Butterworth S, ... RH-S science &, *et al.* The life course prospective  
306 design: an example of benefits and problems associated with study longevity. *Elsevier*
- 307 7 Altman R, Asch E, Bloch D, *et al.* Development of criteria for the classification and  
308 reporting of osteoarthritis. Classification of osteoarthritis of the knee. Diagnostic and  
309 Therapeutic Criteria Committee of the American Rheumatism Association. *Arthritis*  
310 *Rheum* 1986;**29**:1039–49.
- 311 8 Kuh D, Bassey EJ, Butterworth S, *et al.* Grip strength, postural control, and functional  
312 leg power in a representative cohort of British men and women: associations with  
313 physical activity, health status, and socioeconomic conditions. *J Gerontol A Biol Sci*  
314 *Med Sci* 2005;**60**:224–31.
- 315 9 Cole T, Kuh D, Johnson W, *et al.* Using Super-Imposition by Translation And

- 316           Rotation (SITAR) to relate pubertal growth to bone health in later life: the Medical  
317           Research Council (MRC) National Survey of Health and Development. *Int J*  
318           *Epidemiol* 2016;**45**:dyw134. doi:10.1093/ije/dyw134
- 319    10    Cole TJ, Donaldson MDC, Ben-Shlomo Y. SITAR—a useful instrument for growth  
320           curve analysis. *Int J Epidemiol* 2010;**39**:1558–66. doi:10.1093/ije/dyq115
- 321    11    Galobardes B, Shaw M, Lawlor DA, *et al.* Indicators of socioeconomic position (part  
322           2). *J Epidemiol Community Heal* 2006;**60**:95–101. doi:10.1136/jech.2004.028092
- 323    12    Kuh DJ, Cooper C. Physical activity at 36 years: patterns and childhood predictors in a  
324           longitudinal study. *J Epidemiol Community Health* 1992;**46**:114–9.
- 325    13    Wills AK, Hardy RJ, Black S, *et al.* Trajectories of overweight and body mass index in  
326           adulthood and blood pressure at age 53: The 1946 British birth cohort study. *J*  
327           *Hypertens* 2010;**28**:679–86. doi:10.1097/HJH.0b013e328335de7b
- 328    14    Hardy R, Ghosh AK, Deanfield J, *et al.* Birthweight, childhood growth and left  
329           ventricular structure at age 60–64 years in a British birth cohort study. *Int J Epidemiol*  
330           2016;**45**:1091–102. doi:10.1093/ije/dyw150
- 331    15    Bedson J, Jordan K, Croft P. The prevalence and history of knee osteoarthritis in  
332           general practice: A case-control study. *Fam Pract* 2005;**22**:103–8.  
333           doi:10.1093/fampra/cmh700
- 334    16    Ireland A, Saunders FR, Muthuri SG, *et al.* Age at Onset of Walking in Infancy Is  
335           Associated With Hip Shape in Early Old Age. *J Bone Miner Res* 2019;**34**:455–63.  
336           doi:10.1002/jbmr.3627
- 337    17    Muthuri SG, Saunders FR, Hardy RJ, *et al.* Associations between body mass index  
338           across adult life and hip shapes at age 60 to 64: Evidence from the 1946 British birth  
339           cohort. *Bone* 2017;**105**:115–21. doi:10.1016/j.bone.2017.08.017

- 340 18 Pavlova A V., Saunders FR, Muthuri SG, *et al.* Statistical shape modelling of hip and  
341 lumbar spine morphology and their relationship in the MRC National Survey of Health  
342 and Development. *J Anat* 2017;**231**:248–59. doi:10.1111/joa.12631
- 343 19 Baird DA, Paternoster L, Gregory JS, *et al.* Investigation of the Relationship Between  
344 Susceptibility Loci for Hip Osteoarthritis and Dual X-Ray Absorptiometry–Derived  
345 Hip Shape in a Population-Based Cohort of Perimenopausal Women. *Arthritis*  
346 *Rheumatol* 2018;**70**:1984–93. doi:10.1002/art.40584
- 347 20 Frysz M, Gregory JS, Aspden RM, *et al.* The effect of pubertal timing, as reflected by  
348 height tempo, on proximal femur shape: Findings from a population-based study in  
349 adolescents. *Bone* 2020;**131**. doi:10.1016/j.bone.2019.115179
- 350 21 Day FR, Elks CE, Murray A, *et al.* Puberty timing associated with diabetes,  
351 cardiovascular disease and also diverse health outcomes in men and women: The UK  
352 Biobank study. *Sci Rep* 2015;**5**:1–12. doi:10.1038/srep11208
- 353 22 Hardy R, Kuh D, Whincup PH, *et al.* Age at puberty and adult blood pressure and  
354 body size in a British birth cohort study. *J Hypertens* 2006;**24**:59–66.  
355 doi:10.1097/01.hjh.0000198033.14848.93
- 356 23 Kuh D, Muthuri SG, Moore A, *et al.* Pubertal timing and bone phenotype in early old  
357 age: findings from a British birth cohort study. *Int J Epidemiol* 2016;**45**:1113–24.  
358 doi:10.1093/ije/dyw131
- 359
